# Supplementary material for: Comparing multilevel and Bayesian spatial random effects survival models to assess geographical inequalities in colorectal cancer survival: a case study
Source: PubMed Central journal article supplement (PMC4197252; doi:10.1186/1476-072x-13-36), 2014-10-04

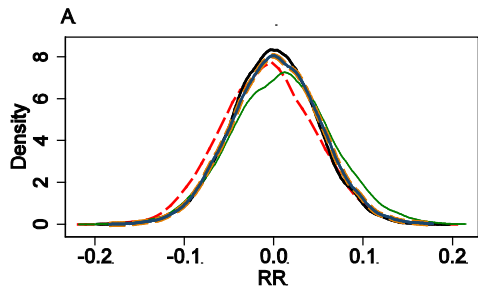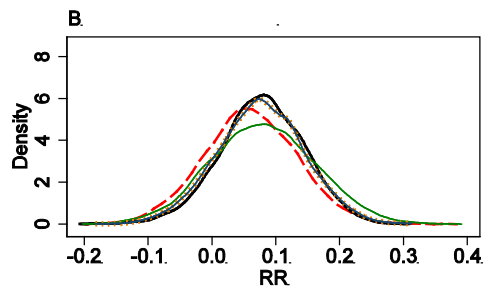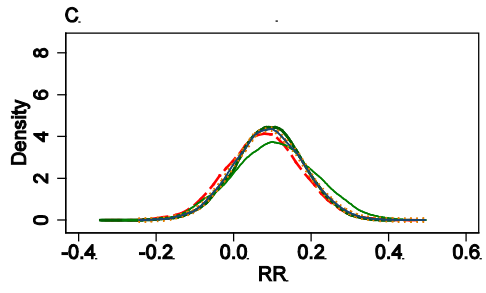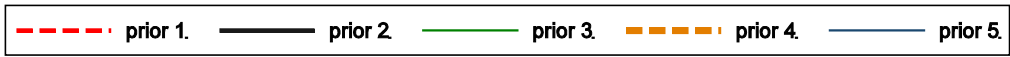

Supplement: 12942_2014_604_MOESM1_ESM.pdf [file 12942_2014_604_MOESM1_ESM.pdf]
